1                   **Title: Hunger for Knowledge: How the Irresistible Lure of Curiosity is**  
2                   **Generated in the Brain**

3  
4                   **Authors:** Johnny King L Lau<sup>1,2\*</sup>, Hiroki Ozono<sup>3</sup>, Kei Kuratomi<sup>4</sup>, Asuka Komiya<sup>5</sup>, Kou  
5                   Murayama<sup>1,2\*</sup>  
6

7                   **Affiliations:**

8                   <sup>1</sup>School of Psychology and Clinical Language Sciences, University of Reading, Reading, UK.

9                   <sup>2</sup>Centre for Integrative Neuroscience and Neurodynamics, University of Reading, Reading, UK.

10                   <sup>3</sup>Faculty of Law, Economics and Humanities, Kagoshima University, Kagoshima, Japan.

11                   <sup>4</sup>Faculty of Psychology, Aichi Shukutoku University, Nagakute-city, Japan.

12                   <sup>5</sup>Graduate School of Integrated Arts and Sciences, Hiroshima University, Higashi-Hiroshima  
13                   city, Japan.

14                   \*Correspondence to: [johnny.lau@reading.ac.uk](mailto:johnny.lau@reading.ac.uk) (Johnny Lau), [k.murayama@reading.ac.uk](mailto:k.murayama@reading.ac.uk) (Kou  
15                   Murayama)

16

17

## 1 **Introductory Paragraph**

2 Curiosity is often portrayed as a desirable feature of human faculty. For example, a meta-  
3 analysis revealed that curiosity predicts academic performance above and beyond intelligence<sup>1</sup>,  
4 corroborating findings that curiosity supported long-term consolidation of learning<sup>2,3</sup>. However,  
5 curiosity may come at a cost of strong seductive power that sometimes puts people in a harmful  
6 situation. Here, with a set of three behavioural and two neuroimaging experiments including  
7 novel stimuli that strongly trigger curiosity (i.e. magic tricks), we examined the psychological  
8 and neural mechanisms underlying the irresistible lure of curiosity. We consistently  
9 demonstrated that across different samples people were indeed willing to gamble to expose  
10 themselves to physical risks (i.e. electric shocks) in order to satisfy their curiosity for trivial  
11 knowledge that carries no apparent instrumental values. Also, underlying this seductive power of  
12 curiosity is its incentive salience properties, which share common neural mechanisms with  
13 extrinsic incentives (i.e. hunger for foods). In particular, the two independent fMRI experiments  
14 using different kinds of curiosity-stimulating stimuli found replicable results that acceptance  
15 (compared to rejection) of curiosity/incentive-driven gambles was accompanied with an  
16 enhanced activity in the striatum.

17

1 Curiosity is a fundamental part of human motivation that supports an enormous variety of  
2 human intellectual behaviours, ranging from early learning in children to scientific discovery<sup>4-6</sup>.  
3 The critical importance of curiosity in human intellectual behaviour is succinctly expressed in  
4 Albert Einstein's famous quote "*I have no special talent. I am only passionately curious.*"  
5 Moreover, empirical literature has revealed a number of positive outcomes associated with  
6 curiosity over the life span<sup>1,7-9</sup>.

7 However, in both historic and modern literature, the positive portrayal of curiosity is  
8 often compromised by its inherent negative aspect: strong seductive power<sup>10</sup>. In Greek  
9 mythology, for example, after losing his beloved *Eurydice* to the underworld, *Orpheus*  
10 convinced the gods to let him take her back to the world of the living on the condition that he  
11 would not look back until they had returned. *Orpheus* could not help but look back; he  
12 succumbed to curiosity and lost *Eurydice*. This theme, which appears repeatedly in classic  
13 ancient anecdotes (e.g., *Pandora*, *Psyche*, *Eve*), illustrates the irresistible power of curiosity,  
14 which biases our decision-making despite the knowledge of consequential negative outcomes.  
15 Previous literature has indicated that both animals<sup>11-13</sup> and humans<sup>3,14-16</sup> are willing to pay  
16 small amounts of costs to satisfy curiosity for the knowledge about a future reward that cannot be  
17 changed. For example, people are willing to sacrifice parts of future monetary reward in  
18 exchange for immediate information about the outcome of a monetary lottery, even though that  
19 information cannot be used to alter lottery outcomes<sup>14</sup>. However, little research has directly  
20 addressed the nature of the strong lure of curiosity for non-instrumental trivial facts, which may  
21 overcome even significant risks.

22 Herein, we report a set of behavioural and neuroimaging experiments, showing that i)  
23 people are willing to expose themselves to physical risks (i.e. electric shocks) to satisfy their

1 curiosity for trivial, non-consequential knowledge (i.e. magic tricks, trivia), and ii) the seductive  
2 power of curiosity shares the same motivational processes as extrinsic incentives (i.e. foods).

3 In the initial behavioural experiment, participants (N=17) were presented with short (8 to  
4 46s; mean = 22.22s; median = 20s) video clips of magic tricks performed by professional  
5 magicians (filmed specifically for this study; Supplementary videos 1-2), followed by a wheel of  
6 fortune visually depicting the probability of winning (versus losing) a lottery in each trial (Fig.  
7 1a). Participants were then asked to make a decision on whether they would gamble to take the  
8 lottery or not. They were told that, if they accept the lottery and win, they can see the secret  
9 behind the magic trick after the experiment (with a certain probability; 16.7% - 83.3%; see  
10 Methods). The experiment also included food trials, in which participants were presented with  
11 food pictures, and they were told that they can eat the food after the experiment if they accept the  
12 lottery and win. Critically, for both trials, if participants accepted the lottery and lost, they were  
13 told that they would receive electric shock after the experiment. The magnitude of electric shock  
14 was calibrated and demonstrated to participants before the experiment. Electric shock was not  
15 delivered during the experimental task, as pilot data indicated that expectation of electric shock  
16 has more sustained effects on participants' fear perception than receiving actual electric shock  
17 multiple times.

18 [INSERT FIGURE 1]

19 Generalised linear mixed-effects modelling showed that participants were more likely to  
20 reject the lottery as the presented outcome probability of receiving electric shock increases  
21 [ $\text{Exp}(\beta) = 2.30$  (for curiosity condition) &  $2.91$  (for food condition),  $P_s < 0.01$ ]. This suggests  
22 that electric shock worked effectively as an aversive stimulus. Importantly, curiosity ratings of  
23 magic tricks and desirability ratings of food items both positively predicted the “accept” decision

1 above and beyond the outcome probability [Exp ( $\beta$ ) = 2.32 (for magic curiosity) & 2.94 (for food  
2 desirability),  $P_s < 0.01$ ]. In other words, curiosity for non-consequential knowledge (i.e. magic  
3 solution), as well as incentive value of foods, can bias decision-making entailing physical risks  
4 (Supplementary Fig. 1 and Supplementary Table 1; also see Fig. 1b for results integrated with  
5 following fMRI experiments).

6 How does curiosity bias our risky decision-making? There are two possibilities. The first  
7 possibility is that curiosity distorts the perception of probability of risks (i.e. when people are  
8 curious and in a positive mood, they overestimate the probability of winning the lottery; <sup>17</sup>). In a  
9 follow-up behavioural experiment, participants (N=29) rated their subjective chance of winning  
10 when presented with a lottery, after seeing a curiosity/hunger evoking stimulus (see  
11 Supplementary Methods). However, curiosity rating for magic tricks [Exp ( $\beta$ ) = 1.03,  $P = 0.13$ ]  
12 or desirability rating for foods [Exp ( $\beta$ ) = 1.05,  $P = 0.17$ ] did not predict the participant's  
13 subjective probability of winning [Bayes Factor ( $BF_{01}$ ) for Magic = 0.00524,  $BF_{01}$  for Food =  
14 0.00658; very strongly supportive of the null hypothesis].

15 Another possibility is that curiosity triggers *incentive salience* for unknown information<sup>18</sup>.  
16 Expectation of reward often increases incentive salience (or “wanting”) and this likely promotes  
17 irrational and risky behaviour through modulating the neurobiological processes in the reward  
18 system <sup>19–21</sup>. Similar psychological mechanisms may underlie the seductive power of curiosity.  
19 Indeed, previous functional magnetic resonance imaging (fMRI) research has revealed that the  
20 state of curiosity (e.g. when participants are waiting for the answer to a trivia question) activates  
21 the striatum<sup>2,3</sup> --- a key brain area for processing incentive salience <sup>22</sup>. To test this hypothesis, we  
22 conducted a neuroimaging experiment with fMRI using a similar experimental paradigm as in  
23 the initial behavioural investigation. If the seductive power of curiosity is driven by increased

1 incentive salience, the striatum will be activated when participants accept the lottery<sup>23,24</sup>. A 2  
2 (stimulus type: magic tricks vs. foods) X 2 (decision: accept vs. reject) analysis of variance  
3 (ANOVA) (N=31) on a priori anatomical striatum region of interest (ROI) showed that the  
4 striatum was indeed activated when participants accepted the lottery in comparison to when they  
5 rejected it, regardless of the stimulus type ( $P_{FWE} < 0.05$ ; Fig. 2a-c). This effect was robustly  
6 observed even after controlling for the “win” probabilities ( $P_{FWE} < 0.05$ ; Supplementary Fig. 2)  
7 in the ROI analysis. No significant interaction between stimulus type and decision was observed  
8 within the ROI. A whole brain analysis also indicated that the striatum showed extensive  
9 activation for accepted trials in comparison to rejected trials among all brain areas  
10 (Supplementary Tables 2-3).

11 [INSERT FIGURE 2]

12 We also examined whether the observed striatal activation mediates the relationship  
13 between curiosity/food desirability ratings and the acceptance of the lottery on a trial-by-trial  
14 basis. A multilevel mediation analysis showed that this mediation effect is statistically significant  
15 ( $P_{mediation} < 0.05$ ; Fig. 2d), further supporting the idea that the curiosity or desire for food induced  
16 by the stimuli prompted people to risk of physical pain by recruiting a common brain network.

17 To further explore the mechanisms underlying curiosity-driven decision that overcomes  
18 potential physical risks, we conducted a beta-series correlation functional connectivity analysis  
19 using the striatum as the seed [a spherical ROI with a 6 mm-radius was created around the peak  
20 voxel of the striatum shown to be activated for the accept (vs. reject) decision in the main fMRI  
21 analysis]. This exploratory analysis found weaker connectivity between the left sensorimotor  
22 cortex and left striatum, suggesting a *decoupling* effect (i.e. weaker functional correlation)  
23 associated with accepting the lottery (Fig. 3, Supplementary Table 4); however statistical

1 analysis only revealed marginal significance ( $P_{FWE} = 0.056$ ) after cluster-level familywise error  
2 correction. The sensorimotor cortex has been implicated in anticipation of aversive signals  
3 including pain<sup>25,26</sup>. Our results may suggest that, when the participant's curiosity to see the secret  
4 of a magic trick overcame the risk of receiving electric shock, there tended to be a dissociation of  
5 incentive salience and expected fear of physical shock in the brain.

6 [INSERT FIGURE 3]

7 Magic tricks evoke people's curiosity through sensory (i.e. visual) input. This type of  
8 curiosity can be described as "perceptual curiosity"<sup>27</sup>. To examine the robustness of our findings  
9 and investigate whether they can be generalised to the type of curiosity that is evoked by  
10 conceptual ambiguities or uncertainties (called "epistemic curiosity"<sup>27</sup>), we conducted a  
11 replication fMRI experiment, in which we presented trivia questions (e.g., "What is the only food  
12 that never spoils?") selected from a standardised database<sup>28</sup> (instead of magic tricks) to stimulate  
13 curiosity within an independent sample. A 2 (stimulus type: trivia questions vs. foods) X 2  
14 (decision: accept vs. reject) ANOVA (N=30) was performed to compare the average beta  
15 contrast values within the striatum ROI, created based on the activation map in the first fMRI  
16 experiment. In the replication fMRI experiment, striatum was again more activated, regardless of  
17 the stimulus type, when participants accepted the lottery to satisfy their curiosity in comparison  
18 to when they rejected it ( $P < 0.05$ , see Supplementary Fig. 3a). Moreover, the mediation effect  
19 was observed ( $P < 0.05$ , Supplementary Fig. 3b), and the sensorimotor cortex (based on a  
20 functional mask created from the connectivity analysis in the first fMRI experiment) also  
21 exhibited functional decoupling with striatal activation ( $P < 0.05$ , Supplementary Fig. 4). Finally,  
22 to explore other brain areas that are associated with a participant's decision-making process, a  
23 whole-brain conjunction analysis was performed to examine the overlapping brain areas between

1 the two fMRI samples for the “accept” (vs. “reject”) decision. In addition to the caudate  
2 nucleus, the dorsal medial prefrontal cortex, premotor cortex and thalamus ( $P < 0.00001$ , uncor;  
3 Fig. 4 & Supplementary Table 2) all exhibited involvement in the decision-making process.

4 [FIGURE 4]

5 Incentive salience is a motivational “hot” feeling, potentially prompting people toward  
6 impulsive behaviours<sup>29</sup>. The effect of incentive salience would be stronger when people make  
7 immediate decisions involving personal dilemmas in contrast to when they make predictions  
8 about the behaviours of others with whom they are emotionally detached<sup>30</sup>. To test this  
9 possibility, we conducted another experiment in which participants made a prediction about the  
10 decision of some hypothetical participants who were depicted to be the subjects to receive actual  
11 experimental treatments. In this “prediction” experiment ( $N = 67$ ), ratings of curiosity and food  
12 desirability were still positively associated with the (predicted) decision to accept lottery, but the  
13 effect of ratings was smaller when compared with the other experiments requiring actual  
14 decision-making ( $P < 0.05$ , for the interaction between Prediction and Rating; see Methods and  
15 Supplementary Table 6). These results provide another compelling evidence for the role of  
16 incentive salience in curiosity-driven risky decision.

17 The current study showed that curiosity biases our decision-making by recruiting the  
18 same incentive motivation process as extrinsic rewards (e.g. foods). These findings suggest that  
19 the seemingly irrational curiosity-based choices that people make can be explained by standard  
20 decision-making models, by assuming that knowledge acquisition has inherent (yet rather  
21 immediate) rewarding value per se<sup>6,31</sup>. A question remains regarding why incentive salience  
22 triggered by curiosity is so strong that it drives people into even self-harming behaviour<sup>32–35</sup>.  
23 Also, previous studies have indicated that curiosity is inherently related to the feeling of anxiety



1 and fear<sup>10</sup>, but our neuroimaging studies did not find clear pattern of activations in the  
2 anxiety/fear related areas<sup>36,37</sup>. A cooperative effort from multiple perspectives such as  
3 development<sup>6</sup>, personality<sup>38</sup>, computation<sup>39</sup>, and evolution<sup>40</sup>, would be required to  
4 comprehensively understand the elusive concept of curiosity.

5

6

1       **Methods**

2       **Participants**

3       The study was approved by the research ethics committees of the University of Reading, UK  
4       (ethics approval number: UREC 16/36). Apart from the follow-up ‘prediction’ experiment,  
5       participants were recruited via mailing lists and SONA, a research participation scheme, at the  
6       University. Participants provided informed consent, completed and passed a health and safety  
7       screening for receiving electric stimulation to confirm that i) they did not have a cardiac  
8       pacemaker (or any other devices that can be affected by electric stimulation); ii) they were free  
9       from neurophysiological symptoms or conditions including peripheral vascular disease,  
10       vasculitis cryoglobulinemia, lupus, tingling or numbness in hands and/or feet. To maximise  
11       participants’ motivation for food consumption during the experiment, they were required not to  
12       eat or drink anything (apart from water) within 2 hours prior to the testing session.

13  
14       Depending on personal preference, participants were compensated either with course credits at a  
15       fixed rate of 1 unit per hour or cash payments for their participation. For behavioural  
16       experiments, a fixed rate of £7 per hour was given, while for fMRI experiments the  
17       compensation for participation was fixed at £10 per hour. In addition, participants were informed  
18       that they may receive extra rewards according to their task performance in the experiment. Each  
19       participant took part in only one version of the experiment.

20  
21       *Initial behavioural experiment*: Seventeen healthy participants (5 males) with an average age of  
22       23.11 years old (sd= ±5.30) participated.

23

1 *fMRI experiment 1 (Curiosity about Magic Tricks)*: Thirty-two healthy individuals were  
2 recruited. One participant accepted every single gamble (100% acceptance on all trials) in the  
3 decision-making task and was thus excluded prior to data analysis. The remaining 31 participants  
4 (5 males) were on average 19.53 years old (sd=  $\pm 1.59$ ) and all right-handed.

5  
6 *fMRI experiment 2 (Curiosity about Trivia)*: Thirty-two healthy adults took part in the  
7 experiment. One of them accepted every single gamble (100% acceptance on all trials). Another  
8 participant had pronounced head movements during MRI scan ( $> 3$ mm displacement in a motion  
9 direction, see Supplementary Methods for further details). Both were excluded prior to data  
10 analysis. A sample of the remaining 30 individuals (6 males) had a mean age of 20.3 years old  
11 (sd=  $\pm 2.49$ ) and all were right-handed.

12  
13 *Follow-up behavioural experiment on estimating the subjective outcome probability (FU1)*:  
14 Twenty-nine healthy participants (7 males) with a mean age of 20.17 years old (sd= $\pm 3.96$ )  
15 participated in this experiment.

16  
17 *Follow-up 'prediction' experiment (FU2)*: Sixty-nine individuals were recruited via Prolific  
18 Academic ([www.prolific.ac](http://www.prolific.ac); a crowdsourcing platform for research participation) to complete  
19 the experiment online and were paid at a fixed rate of £5.2 per hour. Two participants reported  
20 that they had taken part in a similar experiment before and were thus excluded prior to data  
21 analysis. The remaining 67 participants (42 males) were 27 years old (sd= $\pm 5.00$ ) on average.

22  
23

## 1 **Materials**

2 *Food Images:* All pictures were colour photographs selected from different sources on the  
3 Internet. They had a resolution of at least 512 X 384 pixels and were edited so that the single  
4 food item was presented in the centre against a white background using GNU Image  
5 Manipulation Program (GIMP) 2, a free open-source graphics editor. A selection of food was  
6 chosen based on the following criteria: first, the items would be familiar to participants to avoid  
7 hesitation due to uncertainty during decision-making; second, there was a wide variety of items  
8 including fruits/vegetables, sweets, snacks and savoury bites (e.g. grapes, salad, chocolate, nuts,  
9 sausage roll, etc.), which might accommodate different individual preferences and tastes for food  
10 and elicit different levels of desirability in participants.

11

12 *Magic trick videos:* Magic tricks, performed by three professional magicians including a  
13 champion of an international magic competition, were recorded in a TV studio with a  
14 professional cameraman using high resolution video cameras. All videos were then edited using  
15 Adobe® Premiere Pro CC® (2015) software to a similar monotonic (dark) background, size (720  
16 x 404 pixels) and viewing focus. The videos were muted (and subtitles were added in a few  
17 videos, when needed). The face of the magician was hidden to avoid potential distraction due to  
18 appearance and any facial expressions (see Supplementary videos 1-2). Out of the pool of 166  
19 video clips, we selected magic tricks to be used in the current study by ensuring that they (1)  
20 include a range of different features (such as the use of cards, sleight of hands, optical illusions)  
21 and (2) likely elicit curiosity to different extents (curiosity ratings were obtained in a different  
22 pilot study). The initial behavioural experiment included 45 food items and 45 magic trick  
23 videos. These videos ranged between 8 – 46 seconds long (mean=22.22; median=20). Due to the

1 precious scanning time allowed, the first fMRI experiment (fMRI experiment 1) used only a  
2 subset of 36 food items and 36 magic tricks from the initial experiment (length of the videos:  
3 range= 8-46 sec; mean=20.61; median=18.5). Then, the two follow-up experiments (FU1 &  
4 FU2) made use of the same set of stimuli as fMRI experiment 1.

5  
6 *Trivia questions:* Sixty trivia questions were selected from a publicly-available 244-item  
7 database, created by our research group<sup>28</sup> (<http://koumurayama.com/resources.php>). The  
8 selected questions were not obviously culture or age specific. Also, for all questions, the answers  
9 were likely to be unknown to the majority of participants. The selection of items corresponded to  
10 different trivia categories that might elicit curiosity among individuals to different extents,  
11 including art/music, history/geography, movies/TV, nature/animals, science, space, sports, food,  
12 as well as other miscellaneous facts. To ensure within-person variability in curiosity evoked  
13 across the experiment, half of the chosen questions were picked among those with high mean  
14 curiosity scores in the database and the other half among those with low mean scores (rated by a  
15 sample of 1498 respondents from a separate online study; for more information, refer to<sup>28</sup>). The  
16 second fMRI experiment (fMRI experiment 2) used 60 trivia questions, as well as 60 food items.  
17 On average, the chosen questions contained 10 (ranging between 6-16) words.

## 18 19 **Procedure**

### 20 *Curiosity-driven Decision-Making Task*

21 The main task of the study followed similar procedures (although there were slight modifications  
22 for the two fMRI and the two follow-up experiments, which are detailed in Supplementary  
23 Methods). In brief, each trial started with a central fixation cross and then a brief letter cue ('M'

1 signified ‘magic trick’; ‘F’ signified ‘food’) to prepare participants for the kind of stimulus they  
2 were about to see. This was followed by the stimulus (either a video of a magic trick in the  
3 curiosity condition or an image of a food item). Participants then gave a rating to indicate their  
4 level of curiosity about the magic trick or level of desirability of the food, on a 7-point scale  
5 (1=not at all, 7=very much). In the curiosity trials, they also had to report how confident they  
6 were to know about the solution to a magic trick, using also a 7-point scale (1=not at all, 7=very  
7 much). (However, because rated confidence was not associated with a participant’s decision and  
8 the inclusion of this measure did not change any main results, to make straightforward  
9 comparisons between curiosity and food trials, it was not included in the reported analysis here.)  
10 After rating the stimulus, participants were then presented with a wheel of fortune (WoF)  
11 representing a lottery which visualised their probability of winning/losing in that trial, and were  
12 asked to decide whether to gamble or not. Participants were instructed that if they accepted the  
13 lottery and won, they would receive a token that might allow them to see the secret behind the  
14 magic trick after the experiment. If they gambled and lost, they would get a token that might  
15 increase the amount of shock they were to experience at the end of the experiment. Participants  
16 could also opt to reject the lottery. At the end of each trial, the outcome of the lottery was  
17 presented. Participants were informed that, as a general rule, the more ‘win’ tokens they  
18 collected, the more likely they would get more rewards. Similarly, the more ‘loss’ tokens they  
19 got, the more likely they would receive more electric shock.

20  
21 There were 5 versions of WoF, each displaying a different combination of the probabilities of  
22 winning and losing a gamble: i) 16.7% (1/6) win vs. 83.3% (5/6) loss; ii) 33.3% (2/6) win vs.  
23 66.7% (4/6) loss; iii) 50% (3/6) win vs. 50% (3/6) loss; iv) 66.7% (4/6) win vs. 33.3% (2/6) loss;

1 v) 83.3% (5/6) win vs. 16.7% (1/6) loss. In the experiments, participants were never shown the  
2 actual percentages but the relative win-to-loss contrast of probabilities was illustrated visually by  
3 the relative sizes of the constituent slices on the WoF (Fig. 1a). To control for the number of  
4 ‘success’ and ‘loss’ experiences, unbeknownst to the participants, there was an equal chance of  
5 winning or losing the lottery across all trials.

6  
7 The curiosity and food trials were mixed and shown in a random order. The task was  
8 programmed and presented using PsychoPy<sup>41</sup>.

9  
10 *Program on the day of the testing session*

11 Participants were asked not to consume any food and drinks (apart from water) within at least 2  
12 hours before attending their testing session. This was confirmed with the participants at the  
13 beginning of the study, including asking them to indicate when they last ate and had their last  
14 meal. Following standard procedures of informed consent and completing corresponding health  
15 and safety screening, participants underwent calibration for electric stimulation to identify a  
16 maximum (uncomfortable yet non-painful) threshold of electric shock they can endure (see  
17 Supplementary Methods for details). Then, they were told about the decision-making task. There  
18 was a practice task that used a different set of stimuli (3 curiosity, 3 food) prior to the main task.

19  
20 At the end of the experiment, participants filled out a post-experiment questionnaire that asked  
21 the extent to which they expected to receive electric shock. In this questionnaire, the majority of  
22 participants across the two fMRI and the follow-up behavioural (i.e. FU1) experiments reported  
23 prospectively that during the experiment they expected to receive the electric shock - 89% of

1       them gave a rating of 3 or above out of 5 (mean=3.67, mode=4), representing their strong belief  
2       that the shock would have happened (we do not have this information from the initial  
3       behavioural study). After completing the questionnaire, rewards (including solutions to some  
4       magic tricks and food items) were delivered. Participants did not actually receive any  
5       electroshock. They were told that they were exempt from the shock as determined by a  
6       probabilistic equation programmed in the task.

7

## 8       **fMRI acquisition**

9       Whole-brain functional and anatomical images were acquired at the Centre for Integrative  
10      Neuroscience and Neurodynamics (CINN), University of Reading, UK using a 3.0 Tesla  
11      Siemens MAGNETOM Trio scanner with a 32-channel Head Matrix coil.

12

### 13      *fMRI experiment 1 (Curiosity about Magic)*

14      Functional images were acquired using a T2\*-weighted gradient-echo echo planar imaging (EPI)  
15      pulse sequence with 37 axial slices (in-plane resolution of 3 x 3 x 3mm, interslice gap: 0.75mm),  
16      interleaved from bottom to top (echo time (TE): 30 ms; repetition time (TR): 2000 ms; flip angle:  
17      90°; field of view (FOV): 1344 x 1344 mm<sup>2</sup>; in-plane matrix: 64 x 64). A high-resolution T1-  
18      weighted three-dimensional anatomical image was also collected, using an MPRAGE-gradient  
19      sequence with 176 x 1mm slices (in-plane resolution of 1 x 1 x 1 mm; TE: 2.52 ms; TR: 2020  
20      ms; Inversion Time (TI):1100 ms; FOV: 250 x 250; flip angle: 9°), enabling optimal localisation  
21      of the functional effects.

22

### 23      *fMRI experiment 2 (Curiosity about Trivia)*



1 Functional images were acquired using the same sequence and parameters as in fMRI  
2 experiment 1. A high-resolution T1-weighted three-dimensional anatomical image was collected  
3 using an MPRAGE-gradient sequence with 192 x 1 mm slices (TE: 2.29 ms; TR: 2300 ms;  
4 TI:900 ms; FOV: 240 x 240; flip angle: 8°).

## 6 **fMRI analysis**

7 Preprocessing and data analyses of the imaging data were performed using the SPM software  
8 ([www.fil.ion.ucl.ac.uk/~spm](http://www.fil.ion.ucl.ac.uk/~spm)). The preprocessing procedures included spatial realignment of the  
9 EPI volumes, co-registration with the structural image, segmentation, group-wise normalisation  
10 using DARTEL, and smoothing (see Supplementary Methods for more details).

### 12 *Region-of-Interest (ROI) Mask*

13 Given past findings and shown in our previous works<sup>42,43</sup>, the striatum plays an important role in  
14 influencing motivation-driven behaviour. We created an anatomical mask encompassing the  
15 bilateral caudates and performed ROI analyses in fMRI experiment 1, using the WFU PickAtlas  
16 toolbox in SPM. The resulting anatomical mask included 832 voxels (2.5 resels).

17  
18 To gauge the robustness and generalisability of the findings observed in fMRI experiment 1, we  
19 created a functional ROI mask based on the functionally activated voxels within the bilateral  
20 striatum from the ROI analysis of fMRI experiment 1 (specifically, from the main ‘decision’  
21 effect: Acceptance > Rejection; thresholded at  $p < 0.001$ , uncorrected; i.e., see fig 2b). This  
22 bilateral functionally defined caudate ROI, comprising 230 voxels (0.9 resels), was then used in  
23 the fMRI experiment 2 analysis. In particular, we computed the average beta/contrast values

1 within this functional mask using MarsBar<sup>44</sup> and conducted a single statistical test to examine  
2 whether the results of fMRI experiment 1 were replicated at a significance level of  $P < 0.05$ .

#### 3 4 Activation predicting curiosity/incentive-driven decision-making

5 One of the aims of the current study was to test whether the participant's decision-making was  
6 influenced by curiosity (about knowledge) and food attraction in a similar manner via the  
7 incentive motivation system. To this aim, the first GLM modelled brain activation depending on  
8 the dichotomous decision in the lottery – whether an individual opted to accept or reject the  
9 gamble. Four separate regressors were specified for the accepted and rejected trials in curiosity  
10 and food categories at the onset of the decision phase of each trial (i.e. when the WoF appeared  
11 and the participant had to start indicating a choice). In addition, to account for the brain  
12 activation related to stimulus presentation, another 4 regressors were included to model the  
13 stimulus presentation phase (for magic trick trials specifically, this was time-locked at the  
14 moment of subjective surprise) of the accepted and rejected trials for the two stimulus categories  
15 (results not reported). We performed a 2x2 repeated-measures ANOVA with category  
16 (curiosity/food) and decision (accepted/rejected) as factors, at the decision phase. We  
17 hypothesised a main effect of decision (i.e. accepted > rejected) in the caudate ROI if curiosity  
18 and food influenced decision in a similar way via the incentive motivation system. We also  
19 examined the interaction effects to probe any potential stimulus-specific effects on decision-  
20 making. A familywise error-corrected voxel-level significance threshold of  $P < 0.05$  was used  
21 within the ROI.

22  
23 For additional whole brain analyses to explore activations outside of the defined ROI and in

1 other contrasts, we used a familywise error-corrected significance threshold of  $P < 0.05$  at the  
2 cluster-level (cluster defining threshold:  $P < 0.001$ ).

3

#### 4 *Controlling for the effect of the probability of outcome (winning/losing) probability*

5 To factor out the effect of the presented probability of winning a lottery (or getting electric  
6 stimulation), we created another GLM and performed a parametric modulation analysis. In this  
7 GLM, the first-level design matrices included two main categorical regressors, modelling the  
8 onsets of the decision phase of trials for the two types of stimuli (curiosity, food). For these two  
9 regressors, a participant's decision in the lottery (i.e. 'accept' choice coded as +1; 'reject' choice  
10 coded as -1) was added as a parametric modulator (PM); the outcome probability was added as  
11 another PM. Similar to the other GLM, we still included reaction time as a PM to factor out the  
12 its potential confounding effect.

13

#### 14 *Conjunction analysis*

15 To examine whether there were consistent effects in curiosity/incentive-driven decision-making  
16 regardless of the stimuli used, we performed a conjunction analysis on the results of the two  
17 fMRI studies (which made use of very different curiosity-inducing materials). The conjunction  
18 analyses, using a masking function of SPM, began with creating and saving a functional  
19 activation mask (image) resulting from a particular SPM contrast of interest (i.e. accepted >  
20 rejected trials) in the first fMRI experiment, thresholded at  $P < 0.001$  (uncorrected). This  
21 activation image was then used as an inclusion mask for the same contrast in the second fMRI  
22 experiment (also thresholded at  $P < 0.001$ , uncorrected), resulting in a conjunction probability of  
23  $P < 0.00001$  for any 'activated' clusters within the mask.

1 Functional Connectivity Analysis

2 Functional connectivity was examined with the beta series correlation method<sup>45</sup> implemented in  
3 BASCO toolbox<sup>46</sup>. This method allows us to use trial-to-trial variability to characterise dynamic  
4 inter-regional interactions. Our a priori ROIs for functional connectivity analyses were the 6mm-  
5 radius spheres centred on the peak voxels of the left (MNI coordinate: -9, 15, 3) and right (6, 15,  
6 3) caudate clusters identified in the main analysis (accepted > rejected gambles) of fMRI  
7 experiment 1.

8  
9 At the first level of the analysis, a new GLM was constructed, in which BOLD response time-  
10 locked to the onset of the decision phase of each trial was modelled individually by a separate  
11 covariate using a canonical haemodynamic response function. This resulted in different  
12 parameter estimates for each trial for each participant. The onsets of stimulus presentation in  
13 each trial, and the six motion parameters for each run were also included in this GLM. Next,  
14 seed-based correlations were computed voxel-wise for each participant and for each of the  
15 experimental conditions of interest. This procedure generated an individual correlation map  
16 between each seed region's beta series and the beta series of all other voxels in the brain  
17 separately for each condition of interest, which was normalised using Fisher's r-to-z  
18 transformation. At the second level, the individual correlation maps were taken into random-  
19 effects t-tests to identify voxels that showed changes in functional connectivity with the ROI  
20 seed (based on trial-by-trial variability in parameter estimates) across different conditions. Given  
21 the exploratory nature of the analysis, in fMRI experiment 1, the analyses were thresholded at  $P$   
22  $< 0.005$  at the voxel-level (uncorrected) (see Supplementary Table 4 for the results). In  
23 particular, a large cluster of voxels were revealed in the left sensorimotor cortex to be less

1 correlated (i.e. decoupled) with the caudate (spherical ROI) in accepted relative to rejected  
2 gambles (Fig. 3). We then created a functional ROI mask based on these ‘functionally  
3 decoupled’ sensorimotor cortex voxels (comprising 105 voxels) to be used in the replication  
4 analysis of fMRI experiment 2.

5  
6 The functional connectivity analysis of fMRI experiment 2 mainly aimed to evaluate whether the  
7 results from fMRI experiment 1 could be replicated, using the same approach as the main GLM  
8 analysis. Specifically, with the correlation (functional connectivity) maps from fMRI experiment  
9 2, we computed average contrast values (parameter estimates) within the functional sensorimotor  
10 cortex ROI using Marsbar toolbox, and performed a single statistical test to examine whether the  
11 functional connectivity results from fMRI experiment 1 (focusing on the differences in the  
12 average contrast values between ‘accept’ and ‘reject’ choices) could be replicated with the  
13 significance level set at  $P < 0.05$ . For further exploratory purposes, we performed an additional  
14 whole brain analysis of differences in functional connectivity between the ‘accept’ and ‘reject’  
15 decisions in fMRI experiment 2 (see Supplementary Table 5).

## 17 **Behavioural analysis**

### 18 Linear mixed effect modelling

19 To examine the main question of whether curiosity and food desirability influence decisions on a  
20 trial-by-trial basis at the behavioural level, we performed analysis using a generalised linear  
21 mixed effects model (GLMM). In the model (separately for curiosity and food conditions), a  
22 participant’s decision (i.e. choice in the lottery, which was either ‘accept’ or ‘reject’) was  
23 specified as the dichotomous outcome, in a logistic link function. Rating of curiosity (or

1 desirability in the food condition) (group-mean centred) and the presented probability of  
2 winning/losing were entered as predictors of the decision. To account for the nested structure of  
3 the data, we specified random intercepts and slopes of participants.

4  
5 We also combined the data from the initial behavioural experiment, fMRI experiment 1 and  
6 fMRI experiment 2 and applied the same GLMM to the combined dataset to synthesise the  
7 results (see Supplementary Table 1). We controlled for the effect of the experiment (i.e. from  
8 which experiment the data were taken from) as an extra fixed effect. This is equivalent to  
9 conducting a fixed-effect meta-analysis across the experiments. Importantly, the ‘experiment’  
10 factor was not significant, indicating no differences in participants’ performance (in terms of  
11 acceptance rate) between the three experiments.

12  
13 The follow-up behavioural experiment FU1 had a specific aim to investigate whether curiosity  
14 and food desirability distort a participant’s subjective probability of winning/losing. The main  
15 analysis in this experiment was based on a linear mixed effects model (LMM) (again, separately  
16 for curiosity and food conditions) that included the rating of curiosity (or desirability in the food  
17 condition) and the presented probability of winning/losing as predictors of subjective probability  
18 of winning the lottery. Again, we specified random intercepts and slopes of participants. We  
19 compared two models, one including rated curiosity (or desirability in the food condition) and  
20 one without, and computed Bayes factors based on the Bayesian Information Criterion from each  
21 model to evaluate to the effect of the rating. Conventional cut-offs for interpreting Bayes factors  
22 are typically based on the ones suggested by Harold Jeffreys<sup>47</sup>.

23

1 The follow-up ‘prediction’ experiment FU2 had participants to predict what choices they thought  
2 other people would make. To compare and test whether these predictions were different from  
3 (i.e. underestimating) the actual decisions made by the ‘real-life’ participants, we performed a  
4 GLMM incorporating data from the initial behavioural experiment, the two fMRI experiments,  
5 as well as the “prediction” study FU2. In this model, there was a fixed-effect factor ‘prediction’  
6 which specified whether a response was a prediction (+1) or an actual decision (-1), a factor  
7 ‘rating’ which specified participants’ ratings of curiosity/desirability of food, a 2-way interaction  
8 of these factors, as well as a factor ‘category’ and a factor for ‘the presented probability of lottery  
9 outcome’ to control for these effects. Importantly, the prediction X rating interaction effect was  
10 negative and significant – specifically, the effect of rating was smaller in the ‘prediction’  
11 experiment than in the other actual experiments, suggesting that making a prediction for others  
12 underestimates the actual effect of curiosity and food desirability in overcoming fear of physical  
13 risks (see Supplementary Table 6).

14  
15 Testing of GLMM and LMM was carried out using the package ‘lme4’ in R.

### 16 17 Mediation analysis

18 To test whether the relationship between rated curiosity/food desirability and the decision to  
19 accept a lottery is mediated by the striatal activation observed in the main fMRI analysis, we  
20 performed a multilevel-mediation analysis using multilevel structural equation modelling with  
21 Mplus<sup>48</sup> (version 7).

22  
23 In this analysis, we specified the indirect paths as starting from Rating through Striatal\_activation

1 to Decision (i.e. Rating → Striatal activation → Decision) as well as the direct path from Rating  
2 to Decision, and analysed data of curiosity and food conditions altogether using trials as the unit  
3 of analysis. Category of the stimulus (i.e. curiosity or food) and the presented probability of  
4 winning were included as covariates in the model. Trial-by-trial average striatal activation was  
5 extracted within the ROI masks, 6mm-radius spheres centred on the peak voxels of the left (MNI  
6 coordinates: -9, 15, 3) and right (6, 15, 3) caudate clusters (i.e., the cluster of the largest  
7 activation) identified previously in the main analysis (accepted > rejected gambles) in fMRI  
8 experiment 1. Decision was treated as a binary outcome variable.

9  
10 To account for the multilevel nature of the data, we used person-mean centring<sup>49</sup> before  
11 parameter estimation and computed cluster robust-standard error to make statistical inference<sup>50</sup>.  
12 After estimating the model, mediation effect was tested by directly evaluating the distribution of  
13 the product confidence limits for the mediation effect using the software PRODCLIN<sup>51</sup>. We  
14 claimed statistical significance at 5% if the 95% confidence interval computed by PRODCLIN  
15 did not include zero.

16



1

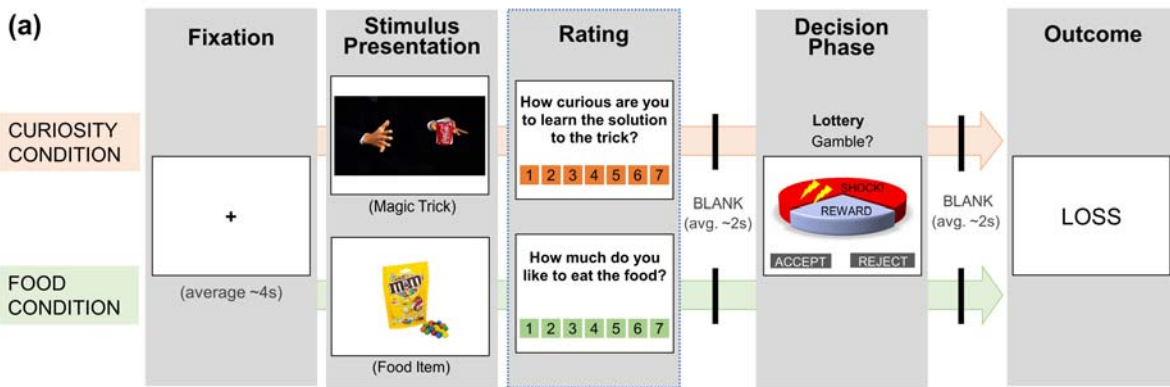

2

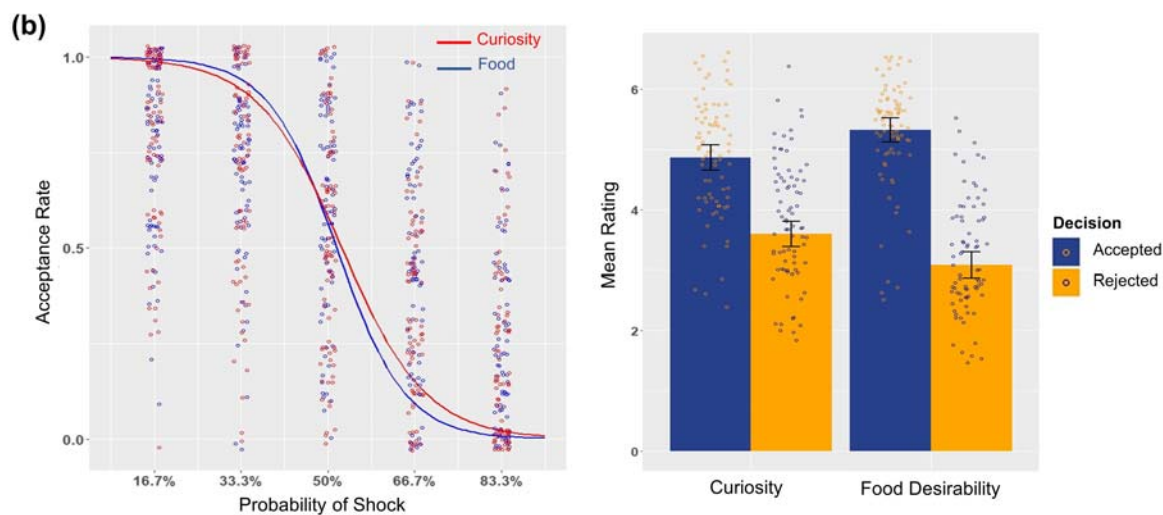

3

4 **Fig. 1 | The experimental task and behavioural results of motivation-driven decision-**

5 **making. a**, Illustration of a typical trial of the experimental task in curiosity and food conditions.

6 In modified versions for the fMRI experiments, (due to time constraints in scanning) the rating

7 phase appeared in only 10% of all trials during the task. **b**, Behavioural results integrated from

8 the initial behavioural and two fMRI experiments. *On the left*: Modelled logistic curve illustrates

9 participants' decisions to accept the lottery at different levels of probability of electric shock in

10 food (blue curve) and curiosity (red curve) conditions. Acceptance rate on y-axis ranges from 0

11 (100% rejection) to 1 (100% acceptance). Each dot represents the average acceptance rate of a

12 participant at that level of shock probability. *On the right*: Bar chart shows higher average rating

1 of curiosity (about magic tricks and trivia questions) and food desirability in accepted (blue)  
2 compared with rejected (orange) gambles. Each dot represents the average rating per participant,  
3 for each condition. Error bars represent  $\pm 1$  standard error of the mean (SEM). Dots on the graphs  
4 are jittered for better visual display. Also see Supplementary Fig. 1 for illustration of the same  
5 effects in individual studies separately.

6

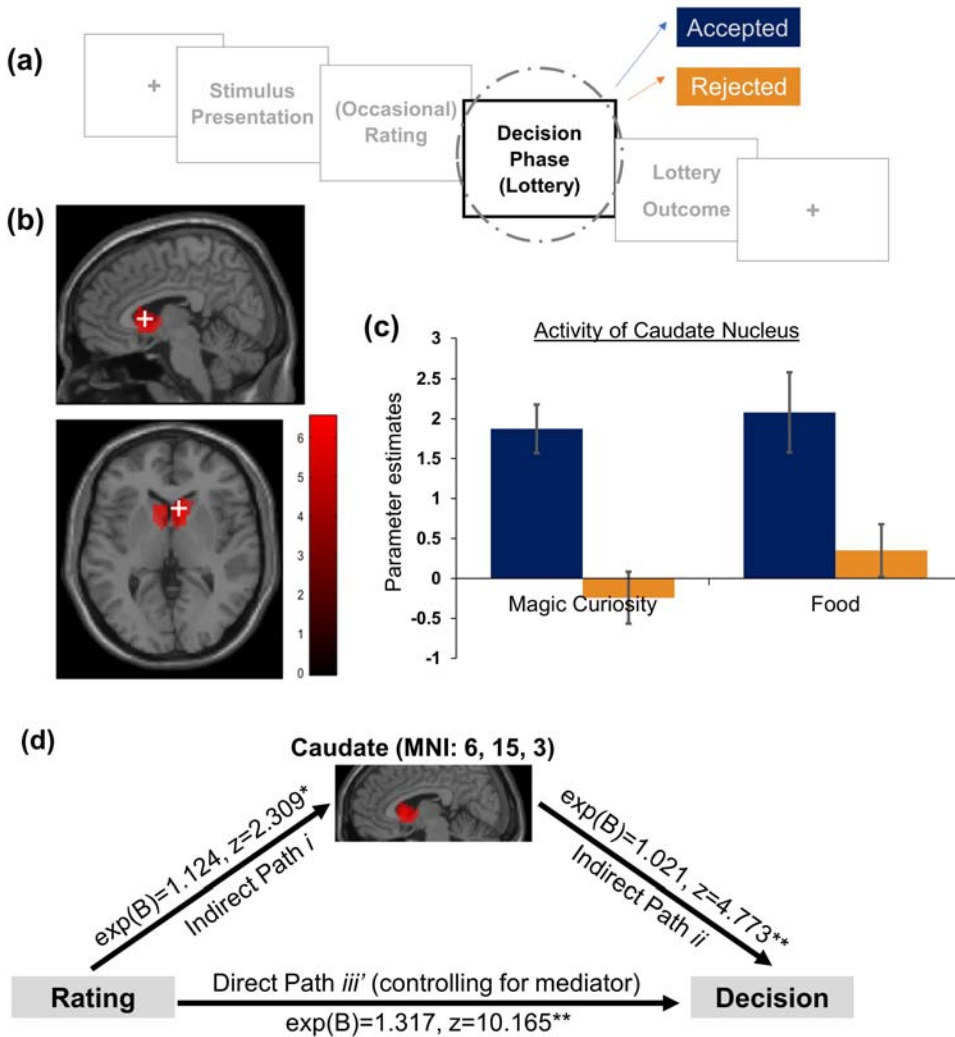

**Fig. 2 | Motivation-driven decision-making is mediated by the striatum (fMRI experiment**

**1).** **a**, Analysis of brain activity associated with decision-making was based on whether a participant accepted or rejected the lottery. **b**, Increased activity within the bilateral caudate nucleus for accepted compared with rejected gambles at the decision phase was significant at  $P<0.05$  with voxel-wise FWE-correction. For display, the results shown here (in red) are thresholded at  $P<0.001$  (uncorrected). **c**, The bar plot shows the mean parameter estimates (i.e. brain activations) for a 6mm-radius sphere centred at a peak voxel (MNI: 6, 15, 3) of the caudate cluster (indicated by the white crosses in **b**) across participants. Error bars represent  $\pm 1$  SEM for each condition. **d**, In the mediation path diagram, rating (of magic curiosity and food

1 desirability) predicts the mean activation of the sphere in the caudate nucleus, illustrated by Path  
2 *i*. The connection of caudate activation (the mediator) to decision in the lottery (the outcome),  
3 Path *ii*, was calculated controlling for rating, as is standard practice for mediation models. The  
4 direct path is Path *iii*', calculated controlling for the mediator. The lines are labelled with  
5 exponential values of path coefficients,  $\exp(B)$ , and  $z$  values. This model also controlled for the  
6 effects of the category of the stimulus and the presented outcome probability in each trial.  
7 \*significant at  $P < 0.05$ ; \*\* $P < 0.01$ .

8

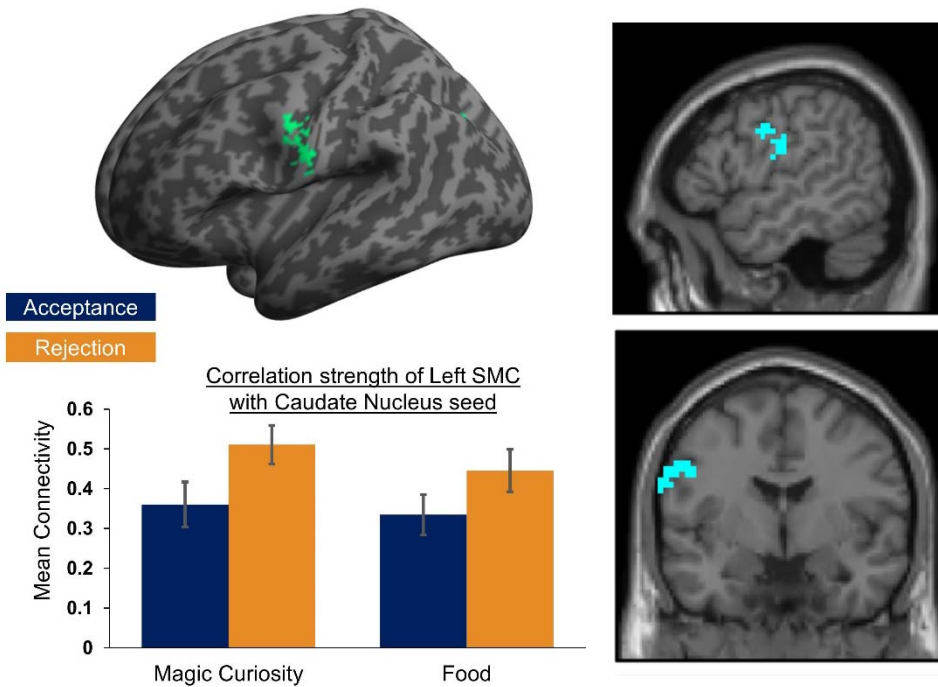

1

2

3

4

5

6

7

8

9

10

11

12

13

**Fig. 3 | Functional connectivity of caudate nucleus in fMRI experiment 1.** Analysis of whole-brain functional connectivity was based on the beta series correlation method using the trial-by-trial variability<sup>45</sup>; the ROI was defined as a 6mm-radius sphere centred at the peak voxel (MNI: -9, 15, 3) in the caudate nucleus (left) identified in the main fMRI analysis. This connectivity analysis revealed a significant main effect of decision in the left sensorimotor cortex (SMC), in which activation was less correlated with the caudate ROI in the accepted compared with rejected gambles (thresholded at  $P < 0.005$ , uncorrected). This is illustrated in 3D rendered and whole brain images in the figure. The bar plot shows the magnitude of correlation ( $r$ , converted back from  $z$  values) between activities in the left caudate ROI and the left SMC cluster in different trial types. Error bars indicate  $\pm 1$  SEM.

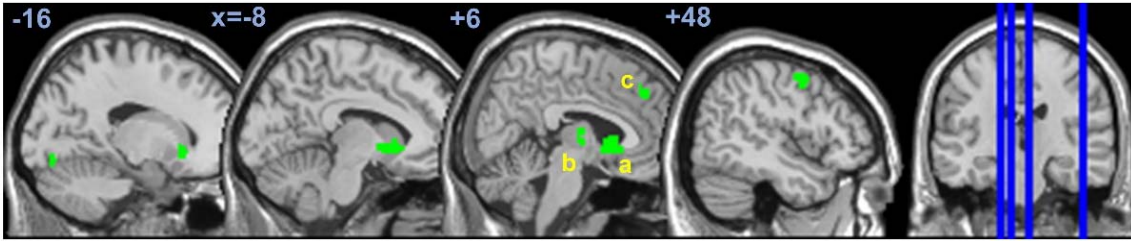

1

2

**Fig. 4 |Common effects of motivation-driven decision from the two fMRI experiments.** The

3

sagittal multi-slice brain images show the conjunction of activations from the main GLM whole-

4

brain analysis of fMRI experiment 1 & 2, each thresholded at the statistical significance of

5

$P < 0.001$  (uncorrected), giving rise to a conjunction probability of  $P < 0.00001$ . Shown in green,

6

the conjunction effects for the contrast ‘Accepted > Rejected gambles’ (across both stimulus

7

types) are found in the left and right caudate nuclei (in slices  $x = -8$  and  $x = 6$  (cluster a)

8

respectively), right thalamus (cluster b), dorsal medial frontal lobe (cluster c), and right premotor

9

cortex ( $x = 48$ ).

10

## References

1. von Stumm, S., Hell, B. & Chamorro-Premuzic, T. The hungry mind: Intellectual curiosity is the third pillar of academic performance. *Perspect. Psychol. Sci.* **6**, 574–588 (2011).
2. Gruber, M. J., Gelman, B. D. & Ranganath, C. States of curiosity modulate hippocampus-dependent learning via the dopaminergic circuit. *Neuron* **84**, 486–496 (2014).
3. Kang, M. J. *et al.* The wick in the candle of learning: Epistemic curiosity activates reward circuitry and enhances memory. *Psychol. Sci.* **20**, 963–973 (2009).
4. Gottlieb, J., Oudeyer, P.-Y., Lopes, M. & Baranes, A. Information-seeking, curiosity, and attention: computational and neural mechanisms. *Trends Cogn. Sci.* **17**, 585–593 (2013).
5. Jirout, J. & Klahr, D. Children’s scientific curiosity: In search of an operational definition of an elusive concept. *Dev. Rev.* **32**, 125–160 (2012).
6. Kidd, C. & Hayden, B. Y. The psychology and neuroscience of curiosity. *Neuron* **88**, 449–460 (2015).
7. Renninger, K. A. & Hidi, S. *The power of interest for motivation and engagement*. (Routledge, NY, 2016).
8. Sakaki, M., Yagi, A. & Murayama, K. Curiosity in old age: A possible key to achieving adaptive aging. *Neurosci. Biobehav. Rev.* **88**, 106–116 (2018).
9. Rozek, C. S., Svoboda, R. C., Harackiewicz, J. M., Hulleman, C. S. & Hyde, J. S. Utility-value intervention with parents increases students’ STEM preparation and career pursuit. *Proc. Natl. Acad. Sci.* **114**, 909–914 (2017).
10. Loewenstein, G. The psychology of curiosity: A review and reinterpretation. *Psychol. Bull.* **116**, 75–98 (1994).

- 1 11. Blanchard, T. C., Hayden, B. Y. & Bromberg-Martin, E. S. Orbitofrontal cortex uses  
2 distinct codes for different choice attributes in decisions motivated by curiosity. *Neuron*  
3 **85**, 602–614 (2015).
- 4 12. Daddaoua, N., Lopes, M. & Gottlieb, J. Intrinsically motivated oculomotor exploration  
5 guided by uncertainty reduction and conditioned reinforcement in non-human primates.  
6 *Sci. Rep.* **6**, 20202 (2016).
- 7 13. Vasconcelos, M., Monteiro, T. & Kacelnik, A. Irrational choice and the value of  
8 information. *Sci. Rep.* **5**, 13874 (2015).
- 9 14. Bennett, D., Bode, S., Brydevall, M., Warren, H. & Murawski, C. Intrinsic valuation of  
10 information in decision making under uncertainty. *PLOS Comput. Biol.* **12**, e1005020  
11 (2016).
- 12 15. Brydevall, M., Bennett, D., Murawski, C. & Bode, S. The neural encoding of information  
13 prediction errors during non-instrumental information seeking. *Sci. Rep.* **8**, 6134 (2018).
- 14 16. Eliaz, K. & Schotter, A. Paying for confidence: An experimental study of the demand for  
15 non-instrumental information. *Games Econ. Behav.* **70**, 304–324 (2010).
- 16 17. Wright, W. F. & Bower, G. H. Mood effects on subjective probability assessment. *Organ.*  
17 *Behav. Hum. Decis. Process.* **52**, 276–291 (1992).
- 18 18. Litman, J. Curiosity and the pleasures of learning: Wanting and liking new information.  
19 *Cogn. Emot.* **19**, 793–814 (2005).
- 20 19. Beckmann, J. S. & Chow, J. J. Isolating the incentive salience of reward-associated  
21 stimuli: value, choice, and persistence. *Learn. Mem.* **22**, 116–127 (2015).
- 22 20. Berridge, K. C. From prediction error to incentive salience: mesolimbic computation of  
23 reward motivation. *Eur. J. Neurosci.* **35**, 1124–1143 (2012).



- 1       21.    Berridge, K. C. The debate over dopamine's role in reward: the case for incentive  
2            salience. *Psychopharmacology (Berl)*. **191**, 391–431 (2007).
- 3       22.    Berridge, K. C., Robinson, T. E. & Aldridge, J. W. Dissecting components of reward:  
4            'liking', 'wanting', and learning. *Curr. Opin. Pharmacol.* **9**, 65–73 (2009).
- 5       23.    Kringelbach, M. L. & Berridge, K. C. in *Recent Developments in Neuroscience Research*  
6            *on Human Motivation* (eds. Kim, S., Reeve, J. & Bong, M.) 23–35 (Emerald Group  
7            Publishing Limited, Bingley, 2016). doi:10.1108/S0749-742320160000019020
- 8       24.    Delgado, M. R., Schotter, A., Ozbay, E. Y. & Phelps, E. A. Understanding overbidding:  
9            Using the neural circuitry of reward to design economic auctions. *Science*. **321**, 1849–  
10           1852 (2008).
- 11      25.    Hayes, D. J. *et al.* GABAA receptors predict aversion-related brain responses: An fMRI-  
12            PET investigation in healthy humans. *Neuropsychopharmacology* **38**, 1438–1450 (2013).
- 13      26.    Whitmarsh, S., Nieuwenhuis, I. L. C., Barendregt, H. P. & Jensen, O. Sensorimotor alpha  
14            activity is modulated in response to the observation of pain in others. *Front. Hum.*  
15            *Neurosci.* **5**, (2011).
- 16      27.    Berlyne, D. E. A theory of human curiosity. *Br. J. Psychol.* **45**, 180–191 (1954).
- 17      28.    Fastrich, G. M., Kerr, T., Castel, A. D. & Murayama, K. The role of interest in memory  
18            for trivia questions: An investigation with a large-scale database. *Motiv. Sci.* **4**, 227–250  
19            (2018).
- 20      29.    Loewenstein, G. & Lerner, J. S. in *Handbook of Affective Science* (eds. Davidson, R.,  
21            Goldsmith, H. & Scherer, K.) 619–642 (Oxford University Press, Oxford, 2003).
- 22      30.    Gilbert, D. T., Lieberman, M. D., Morewedge, C. K. & Wilson, T. D. The peculiar  
23            longevity of things not so bad. *Psychol. Sci.* **15**, 14–19 (2004).

- 1 31. Murayama, K., FitzGibbon, L. & Sakaki, M. Process account of curiosity and interest: A  
2 reward learning model of knowledge acquisition (OSF Preprints). Preprint at  
3 <https://osf.io/hbcz5> (2018).
- 4 32. Hsee, C. K. & Ruan, B. The Pandora effect: The power and peril of curiosity. *Psychol.*  
5 *Sci.* **27**, 659–666 (2016).
- 6 33. Wilson, T. D. *et al.* Just think: The challenges of the disengaged mind. *Science.* **345**, 75–  
7 77 (2014).
- 8 34. Kruger, J. & Evans, M. The paradox of Aplysius and the pursuit of unwanted information.  
9 *J. Exp. Soc. Psychol.* **45**, 1173–1179 (2009).
- 10 35. Oosterwijk, S. Choosing the negative: A behavioral demonstration of morbid curiosity.  
11 *PLoS One* **12**, e0178399 (2017).
- 12 36. Mobbs, D. *et al.* When fear is near: Threat imminence elicits prefrontal-periaqueductal  
13 gray shifts in humans. *Science.* **317**, 1079–1083 (2007).
- 14 37. Adolphs, R. The biology of fear. *Curr. Biol.* **23**, R79-93 (2013).
- 15 38. Dubois, J., Galdi, P., Han, Y., Paul, L. K. & Adolphs, R. Resting-state functional brain  
16 connectivity best predicts the personality dimension of openness to experience. *Personal.*  
17 *Neurosci.* **1**, e6 (2018).
- 18 39. Oudeyer, P.-Y. & Kaplan, F. What is intrinsic motivation? A typology of computational  
19 approaches. *Front. Neurobot.* **1**, 1–14 (2007).
- 20 40. Pisula, W., Turlejski, K. & Charles, E. P. Comparative psychology as unified psychology:  
21 The case of curiosity and other novelty-related behavior. *Rev. Gen. Psychol.* **17**, 224–229  
22 (2013).
- 23 41. Peirce, J. W. Generating stimuli for neuroscience using PsychoPy. *Front. Neuroinform.* **2**,

- 1 (2009).
- 2 42. Murayama, K., Matsumoto, M., Izuma, K. & Matsumoto, K. Neural basis of the  
3 undermining effect of monetary reward on intrinsic motivation. *Proc. Natl. Acad. Sci.* **107**,  
4 20911–20916 (2010).
- 5 43. Murayama, K. *et al.* How self-determined choice facilitates performance: A Key role of  
6 the ventromedial prefrontal cortex. *Cereb. Cortex* **25**, 1241–1251 (2015).
- 7 44. Brett, M., Anton, J.-L., Valabregue, R. & Poline, J.-B. Region of interest analysis using an  
8 SPM toolbox. In: 8th International Conference on Functional Mapping of the Human  
9 Brain. *NeuroImage* **16**, (2002).
- 10 45. Rissman, J., Gazzaley, A. & D’Esposito, M. Measuring functional connectivity during  
11 distinct stages of a cognitive task. *Neuroimage* **23**, 752–763 (2004).
- 12 46. Göttlich, M., Beyer, F. & Krämer, U. M. BASCO: a toolbox for task-related functional  
13 connectivity. *Front. Syst. Neurosci.* **9**, (2015).
- 14 47. Jeffreys, H. *Theory of Probability*. (Clarendon Press, Oxford, 1961).
- 15 48. Muthén, L. K. & Muthén, B. O. *Mplus User’s Guide. Seventh Edition.* (2012).
- 16 49. Enders, C. K. & Tofighi, D. Centering predictor variables in cross-sectional multilevel  
17 models: A new look at an old issue. *Psychol. Methods* **12**, 121–138 (2007).
- 18 50. McNeish, D., Stapleton, L. M. & Silverman, R. D. On the unnecessary ubiquity of  
19 hierarchical linear modeling. *Psychol. Methods* **22**, 114–140 (2017).
- 20 51. MacKinnon, D. P., Fritz, M. S., Williams, J. & Lockwood, C. M. Distribution of the  
21 product confidence limits for the indirect effect: Program PRODCLIN. *Behav. Res.*  
22 *Methods* **39**, 384–389 (2007).
- 23

1        **Acknowledgments**

2        The study was supported by the Marie Curie Career Integration Grant (CIG630680 to K.M.),  
3        JSPS KAKENHI (15H05401; 16H06406 , 18H01102, and 18K18696 to K.M.), F. J. McGuigan  
4        Early Career Investigator Prize (to K.M.), and the Leverhulme Trust (RPG-2016-146 and RL-  
5        2016-030 to K.M.). We are grateful of the magicians (including Shota Irieda and Ohkubo Kohei)  
6        for producing magic tricks for our research. We thank E. Daveau for helping with data collection,  
7        C. Inaltay, A. Firat, A. Haffey, J. Raw, and G. Fastrich for editing and pilot-testing magic video  
8        clips, and C. McNabb for providing useful comments on the drafts of the article.

9  
10       **Author contributions**

11       K.M. conceived the idea; J.K.L.L. and K.M. jointly designed the study; H.O., A.K., and K.K.  
12       created experimental materials. J.K.L.L. performed research and analyzed the data; J.K.L.L. and  
13       K.M. jointly wrote the paper. All authors provided critical comments. The authors declare no  
14       conflicts of interest.

15  
16       **Supplementary Materials:**

17       Supplementary Methods

18       Supplementary Figures 1-4

19       Supplementary Tables 1-6

20       Captions for Supplementary videos
